# Supplementary material
Source: PubMed Central journal article supplement (PMC3753005)
Supplement: NIHMS494701-supplement-supplemental_bioorg_2012_chorell.pdf [file NIHMS494701-supplement-supplemental_bioorg_2012_chorell.pdf]

# Mapping pilicide anti-virulence effect in *E. coli*, a comprehensive structure-activity study

Erik Chorell<sup>1, 2</sup>, Jerome S. Pinkner<sup>2</sup> Christoffer Bengtsson<sup>1</sup>, Thomas Sainte-Luce Banchelin<sup>1, 3</sup>, Sofie Edvinsson<sup>1</sup>, Anna Linusson<sup>1</sup>, Scott J. Hultgren<sup>2\*</sup> and Fredrik Almqvist<sup>1,3\*</sup>

<sup>1</sup>Department of Chemistry, Umeå University, SE-90187 Umeå Sweden. <sup>2</sup>Department of Molecular Microbiology, Washington University School of Medicine, St. Louis, MO 63110, USA. <sup>3</sup>Umeå Centre for Microbial Research, Umeå University, SE-90187 Umeå, Sweden.

Supporting Information

---

\* To whom correspondence should be addressed. Address: Department of Chemistry, Umeå University, SE-90187 Umeå Sweden. Phone: +46 90 7866925. Fax: +46 90 7867655. E-mail: fredrik.almqvist@chem.umu.se or Address: Department of Molecular Microbiology, Center for Women's Infectious Disease Research, Washington University School of Medicine, St. Louis, MO 63110, USA. E-mail: hultgren@borcim.wustl.edu.

Score plot showing the 24 di-substituted derivatives that was chosen by the D-optimal design (red boxes):

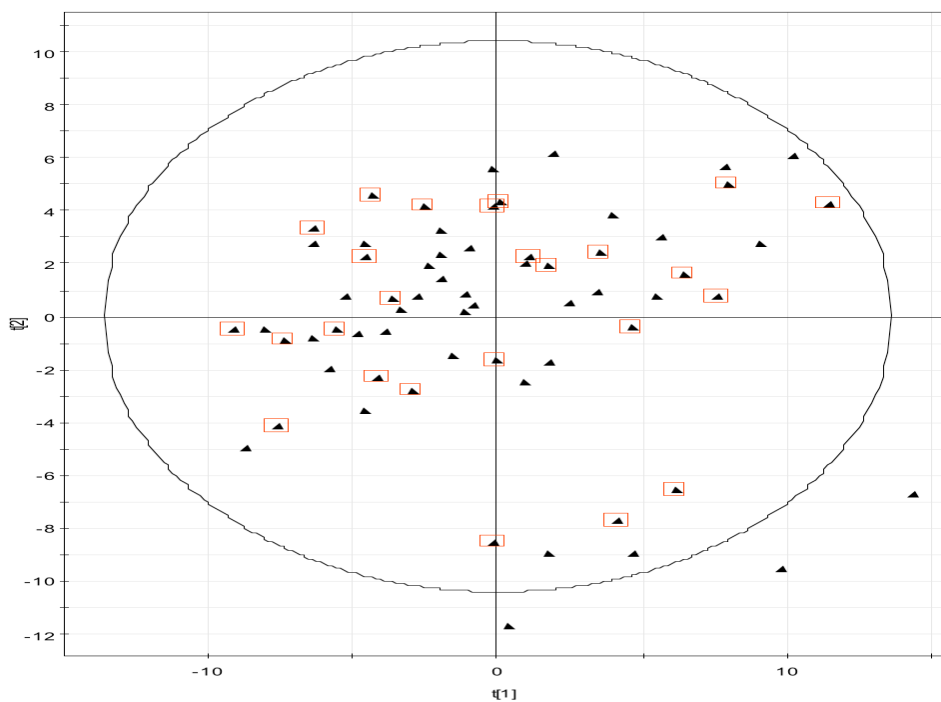

Score

Plot from the PCA of all 24 di-substituted compounds in the training set (red = inactive, black = active):

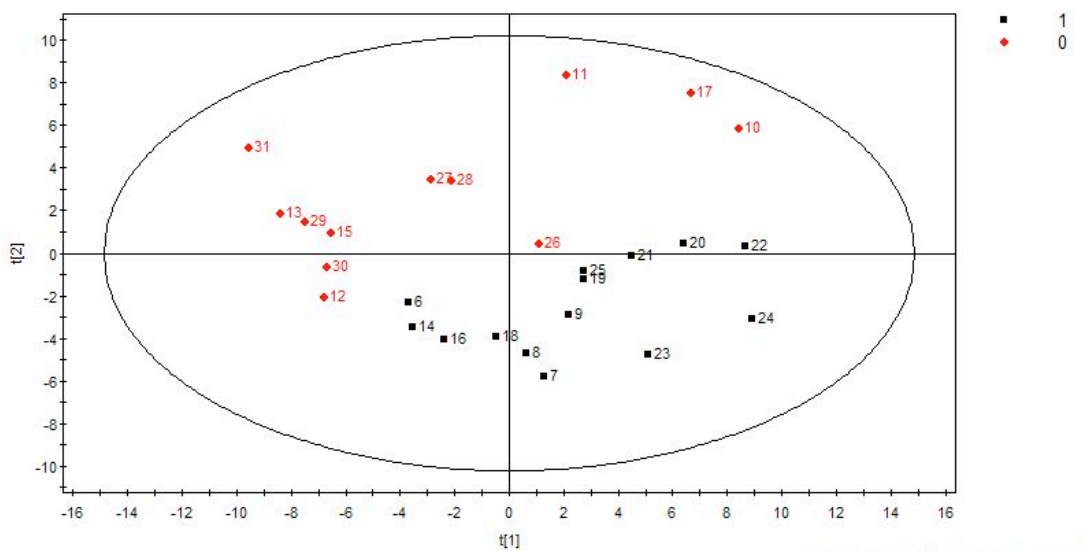

SIMCA-P+ 12.0.1 - 2011-10-13 14:33:38 (UTC-8)



### OPLS-DA DModX plot of all 24 di-substituted compounds in the training set:

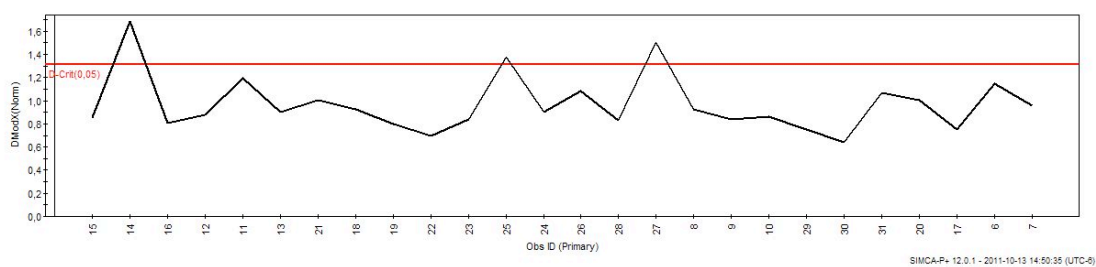

### PLS Variable importance plot:

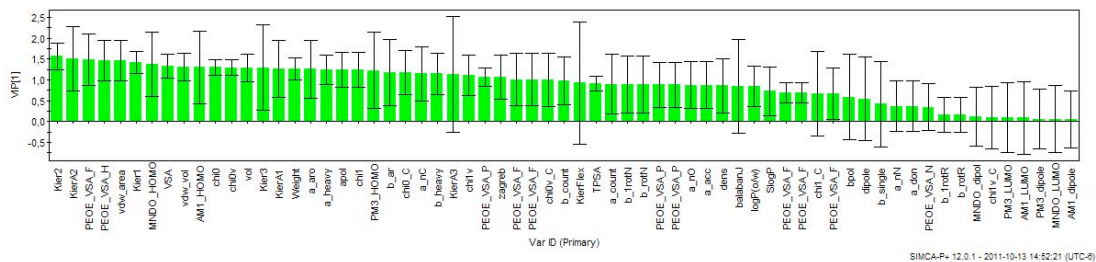

### PLS Loading column plot:

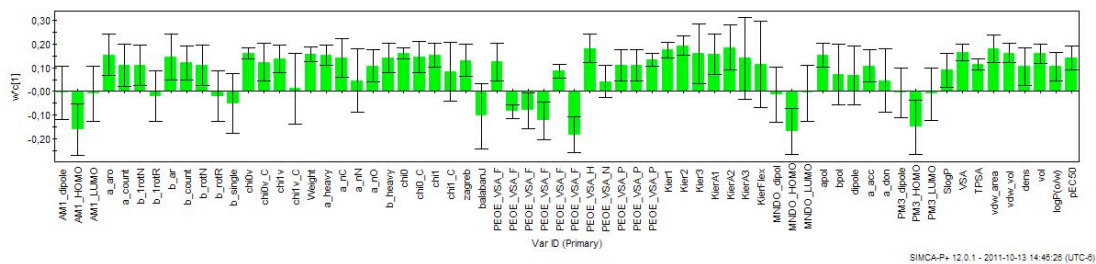

### PLS DModX plot of all 24 di-substituted compounds in the training set:

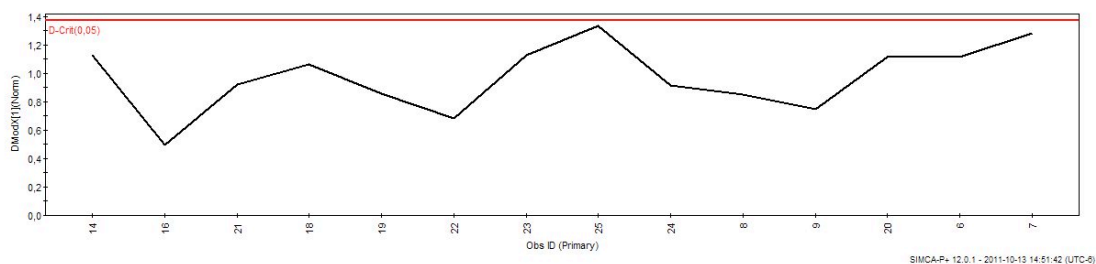

Descriptors used in all models:

# Descriptors:

- 1 AM1\_dipole
- 2 AM1\_HOMO
- 3 AM1\_LUMO
- 4 a\_aro
- 5 a\_count
- 6 b\_1rotN
- 7 b\_1rotR
- 8 b\_ar
- 9 b\_count
- 10 b\_rotN
- 11 b\_rotR
- 12 b\_single
- 13 chi0v
- 14 chi0v\_C
- 15 chi1v
- 16 chi1v\_C
- 17 Weight
- 18 a\_heavy
- 19 a\_nC
- 20 a\_nN
- 21 a\_nO
- 22 b\_heavy
- 23 chi0
- 24 chi0\_C
- 25 chi1
- 26 chi1\_C
- 27 zagreb
- 28 balabanJ
- 29 PEOE\_VSA\_FHYD

30 PEOE\_VSA\_FNEG  
31 PEOE\_VSA\_FPNEG  
32 PEOE\_VSA\_FPOL  
33 PEOE\_VSA\_FPOS  
34 PEOE\_VSA\_FPPOS  
35 PEOE\_VSA\_HYD  
36 PEOE\_VSA\_NEG  
37 PEOE\_VSA\_PNEG  
38 PEOE\_VSA\_POL  
39 PEOE\_VSA\_POS  
40 PEOE\_VSA\_PPOS  
41 Kier1  
42 Kier2  
43 Kier3  
44 KierA1  
45 KierA2  
46 KierA3  
47 KierFlex  
48 MNDO\_dipole  
49 MNDO\_HOMO  
50 MNDO\_LUMO  
51 apol  
52 bpol  
53 dipole  
54 a\_acc  
55 a\_don  
56 PM3\_dipole  
57 PM3\_HOMO  
58 PM3\_LUMO  
59 SlogP  
60 VSA

- 61 TPSA
- 62 vdw\_area
- 63 vdw\_vol
- 64 dens
- 65 vol
- 66 logP(o/w)
